# Supplementary material for: Comparison of Brain Activation during Motor Imagery and Motor Movement Using fNIRS
Source: Hindawi journal article supplement (doi:10.1155/2017/5491296), 2017-01-01
Supplement: f1 [file 5491296.f1.zip]

# **Comparison of Brain Activation During Motor Imagery and Motor Movement Using fNIRS**

## **Supplementary Material**

Alyssa M. Batula, Jesse A. Mark, Youngmoo E. Kim, Hasan Ayaz

### **Contents**

- Significance Tests
  - Table S1: Effect of Task, Motor Type, and Task\*Type Interaction
  - Table S2: Effect of Task by Optode and Motor Type
  - Table S3: Effect of Motor Type by Task and Optode
  
- Motor Imagery and Execution Activation Over Time
  - Figure S1: Right Hand
  - Figure S2: Left Hand
  - Figure S3: Right Foot
  - Figure S4: Left Foot

**Table S1** Effect of Task, Motor Type, and Task\*Type Interaction. Comparison of Task (5 levels: left hand, right hand, left foot, right foot, rest), Motor Type (2 levels: motor imagery, motor execution), and the interaction between Task and Type. Significant effects ( $p < 0.05$ , FDR adjusted) are highlighted in bold.

| Optode | Task          | Type          | Task*Type     |
|--------|---------------|---------------|---------------|
| 1      | <b>0.0328</b> | <b>0.0000</b> | <b>0.0329</b> |
| 2      | 0.2811        | 0.2673        | 0.0637        |
| 3      | 0.2016        | 0.1003        | 0.6258        |
| 4      | 0.4318        | 0.1003        | 0.5784        |
| 5      | <b>0.0193</b> | 0.9627        | <b>0.0072</b> |
| 6      | 0.0862        | 0.7860        | 0.7322        |
| 7      | <b>0.0000</b> | 0.5471        | <b>0.0000</b> |
| 8      | 0.2420        | 0.7394        | 0.7997        |
| 9      | <b>0.0097</b> | <b>0.0000</b> | <b>0.0105</b> |
| 10     | <b>0.0015</b> | 0.6030        | <b>0.0113</b> |
| 11     | 0.1327        | 0.2673        | 0.6462        |
| 12     | <b>0.0041</b> | 0.7394        | 0.2157        |
| 13     | <b>0.0151</b> | <b>0.0009</b> | <b>0.0399</b> |
| 14     | <b>0.0328</b> | 0.6030        | 0.9796        |
| 15     | 0.4834        | 0.6487        | 0.3599        |
| 16     | <b>0.0097</b> | <b>0.0047</b> | <b>0.0019</b> |
| 17     | <b>0.0328</b> | 0.6030        | 0.7997        |
| 18     | <b>0.0097</b> | 0.7394        | 0.4848        |
| 19     | <b>0.0328</b> | 0.1003        | <b>0.0329</b> |
| 20     | 0.7382        | 0.7394        | 0.9796        |
| 21     | <b>0.0328</b> | 0.7953        | 0.0566        |
| 22     | <b>0.0033</b> | <b>0.0000</b> | <b>0.0065</b> |
| 23     | 0.2811        | 0.2673        | 0.7202        |
| 24     | <b>0.0015</b> | <b>0.0038</b> | <b>0.0065</b> |

**Table S2** Effect of Task by Optode and Motor Type. Significant effects ( $p < 0.05$ , FDR corrected) are highlighted in bold.

| Optode | Motor Execution |                 | Motor Imagery |                 |
|--------|-----------------|-----------------|---------------|-----------------|
|        | F-Value         | <i>p</i> -Value | F-Value       | <i>p</i> -Value |
| 1      | 2.6811          | 0.0946          | 3.3231        | <b>0.0448</b>   |
| 2      | 2.2218          | 0.1581          | 0.7146        | 0.7036          |
| 3      | 1.2542          | 0.4309          | 0.1638        | 0.9771          |
| 4      | 1.0478          | 0.5241          | 0.6683        | 0.7036          |
| 5      | 4.5772          | <b>0.0120</b>   | 0.6441        | 0.7045          |
| 6      | 1.3485          | 0.4295          | 1.2604        | 0.4309          |
| 7      | 12.9852         | <b>0.0000</b>   | 3.5510        | <b>0.0332</b>   |
| 8      | 0.5861          | 0.7340          | 1.8726        | 0.2584          |
| 9      | 4.2945          | <b>0.0143</b>   | 2.6608        | 0.0946          |
| 10     | 6.0101          | <b>0.0021</b>   | 0.8421        | 0.6297          |
| 11     | 1.2692          | 0.4309          | 1.7141        | 0.3153          |
| 12     | 4.1872          | <b>0.0150</b>   | 1.3980        | 0.4295          |
| 13     | 2.9167          | 0.0732          | 2.2381        | 0.1581          |
| 14     | 0.9764          | 0.5608          | 2.5690        | 0.1040          |
| 15     | 1.0897          | 0.5098          | 0.4512        | 0.8230          |
| 16     | 5.8867          | 0.0021          | 0.6750        | 0.7036          |
| 17     | 1.5853          | 0.3659          | 1.3229        | 0.4295          |
| 18     | 2.4592          | 0.1201          | 1.5325        | 0.3659          |
| 19     | 3.2432          | <b>0.0495</b>   | 0.2530        | 0.9473          |
| 20     | 0.0588          | 0.9936          | 0.9298        | 0.5783          |
| 21     | 3.1099          | 0.0566          | 1.5488        | 0.3659          |
| 22     | 4.7873          | <b>0.0106</b>   | 4.0439        | <b>0.0157</b>   |
| 23     | 1.1272          | 0.4994          | 0.6661        | 0.7036          |
| 24     | 4.4088          | <b>0.0133</b>   | 1.3407        | 0.4295          |

**Table S3** Effect of Motor Type by Task and Optode. Optodes and Tasks with a significant effect of Motor Type ( $p < 0.05$ , FDR adjusted) are shown in bold. The tasks are Left Hand (LH), Left Foot (LF), Right Foot (RF), and Right Hand (RH).

| Optodes | LH            | LF            | RF            | RH            |
|---------|---------------|---------------|---------------|---------------|
| 1       | <b>0.0099</b> | <b>0.0019</b> | 0.0709        | <b>0.0001</b> |
| 2       | 0.9573        | 0.7512        | <b>0.0011</b> | 0.7798        |
| 3       | 0.6287        | 0.1023        | 0.9311        | 0.4473        |
| 4       | 0.8615        | 0.9252        | 0.1023        | 0.1161        |
| 5       | <b>0.0064</b> | 0.7798        | 0.0675        | 0.4098        |
| 6       | 0.4473        | 0.9228        | 0.5394        | 0.8151        |
| 7       | <b>0.0000</b> | 0.9073        | <b>0.0010</b> | 0.8151        |
| 8       | 0.4098        | 0.9252        | 0.8611        | 0.7798        |
| 9       | <b>0.0001</b> | <b>0.0093</b> | 0.5702        | 0.2952        |
| 10      | <b>0.0008</b> | 0.8615        | 0.6503        | 0.6780        |
| 11      | 0.3452        | 0.9073        | 0.1947        | 0.9073        |
| 12      | 0.2466        | 0.9073        | 0.1070        | 0.5266        |
| 13      | <b>0.0005</b> | 0.9823        | 0.1023        | 0.1161        |
| 14      | 0.9252        | 0.8521        | 0.6882        | 0.7755        |
| 15      | 0.2250        | 0.5394        | 0.8151        | 0.4473        |
| 16      | 0.6705        | 0.8611        | <b>0.0399</b> | <b>0.0000</b> |
| 17      | 0.9073        | 0.7798        | 0.9823        | 0.3205        |
| 18      | 0.2810        | 0.5394        | 0.6503        | 0.6882        |
| 19      | <b>0.0020</b> | 0.4473        | 0.7798        | 0.6503        |
| 20      | 0.9073        | 0.9073        | 0.9573        | 0.7022        |
| 21      | 0.0709        | 0.9823        | 0.4473        | 0.2120        |
| 22      | 0.6705        | <b>0.0013</b> | <b>0.0005</b> | <b>0.0002</b> |
| 23      | 0.5369        | 0.5394        | 0.8615        | 0.1947        |
| 24      | 0.3157        | 0.1330        | <b>0.0064</b> | <b>0.0095</b> |

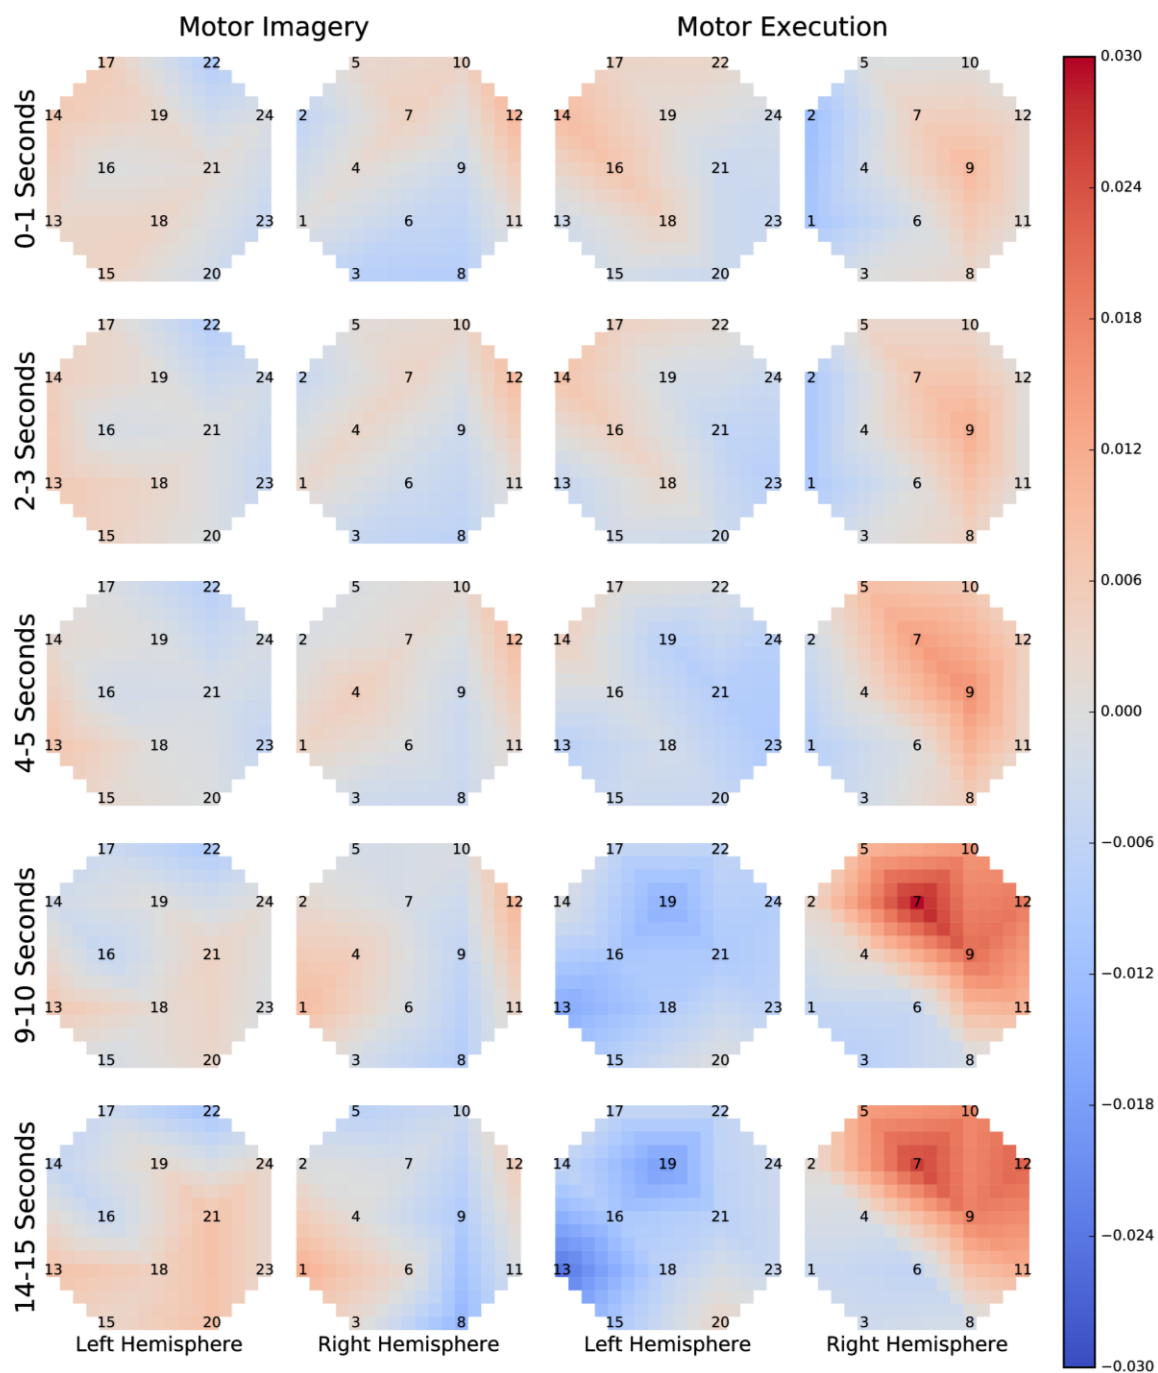

**Fig. S1** Average in HbO activation over time for motor imagery and motor execution during the left hand task

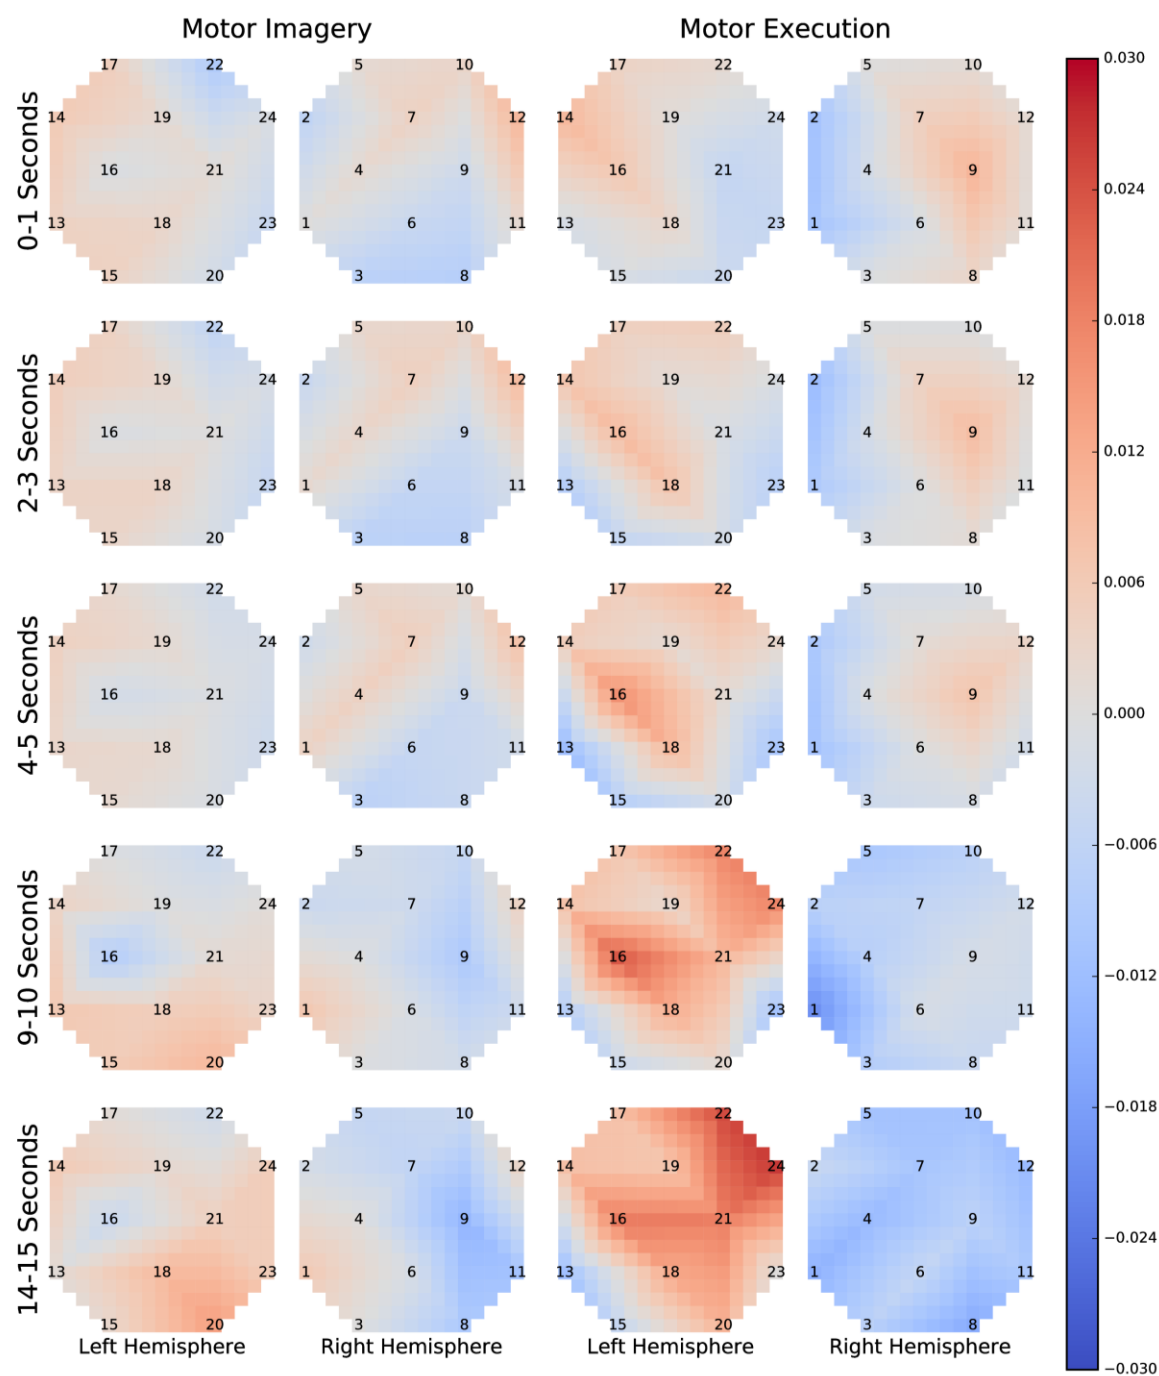

**Fig. S2** Average in HbO activation over time for motor imagery and motor execution during the right hand task

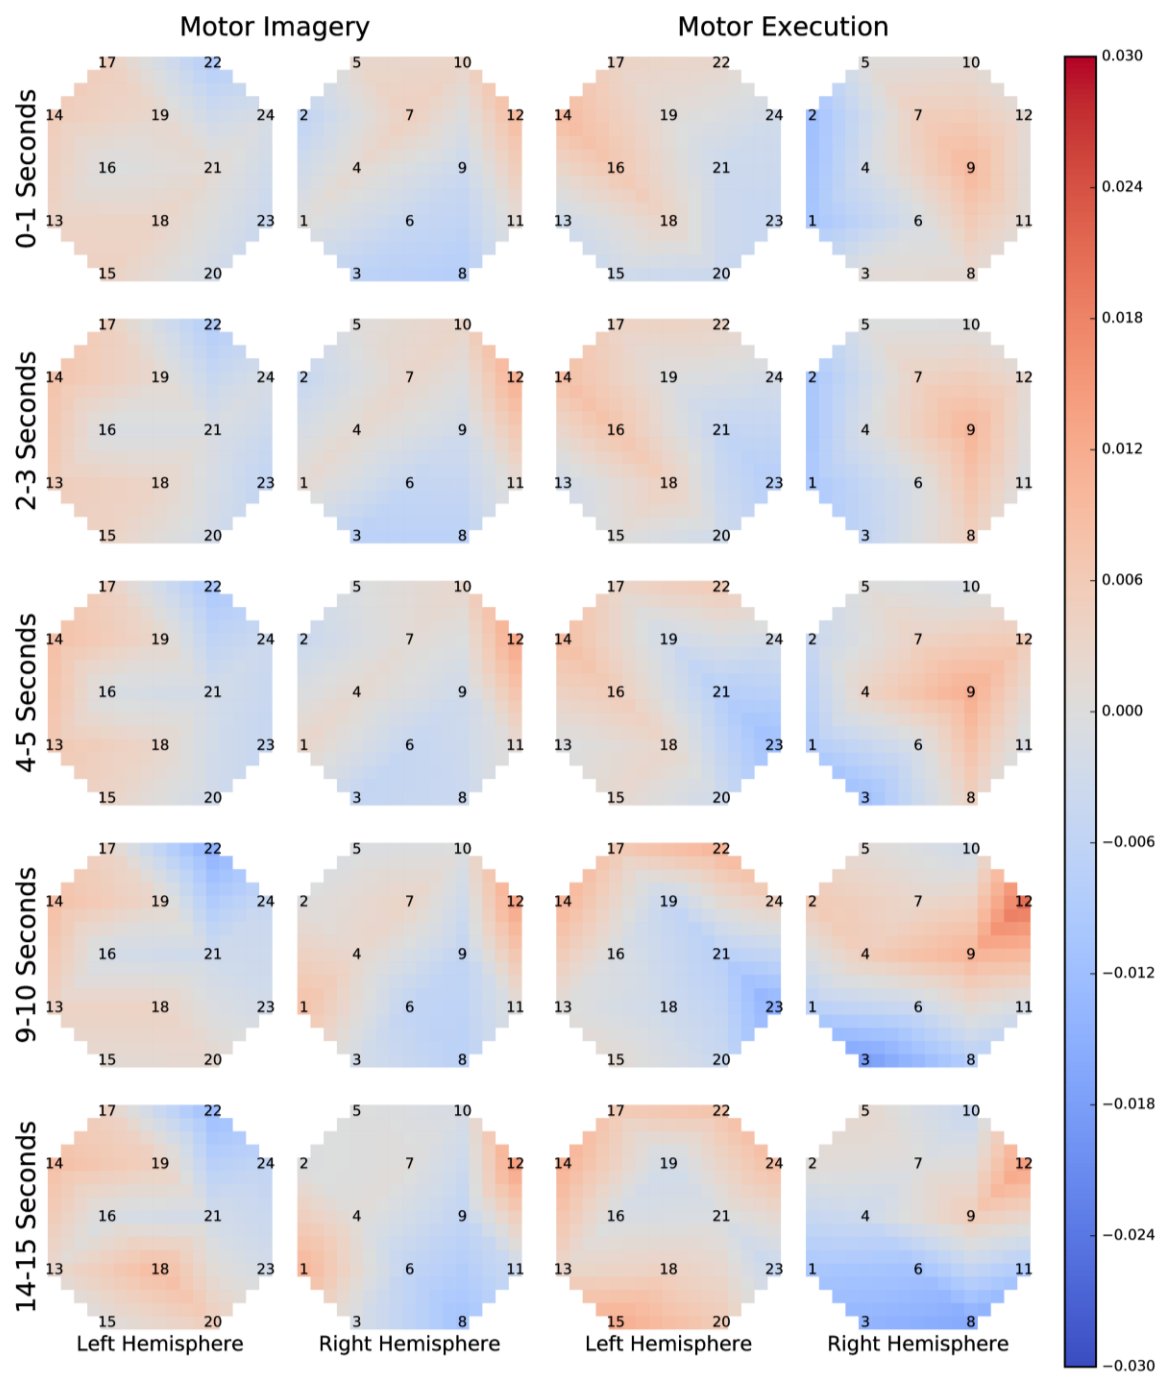

**Fig. S3** Average in HbO activation over time for motor imagery and motor execution during the left foot task

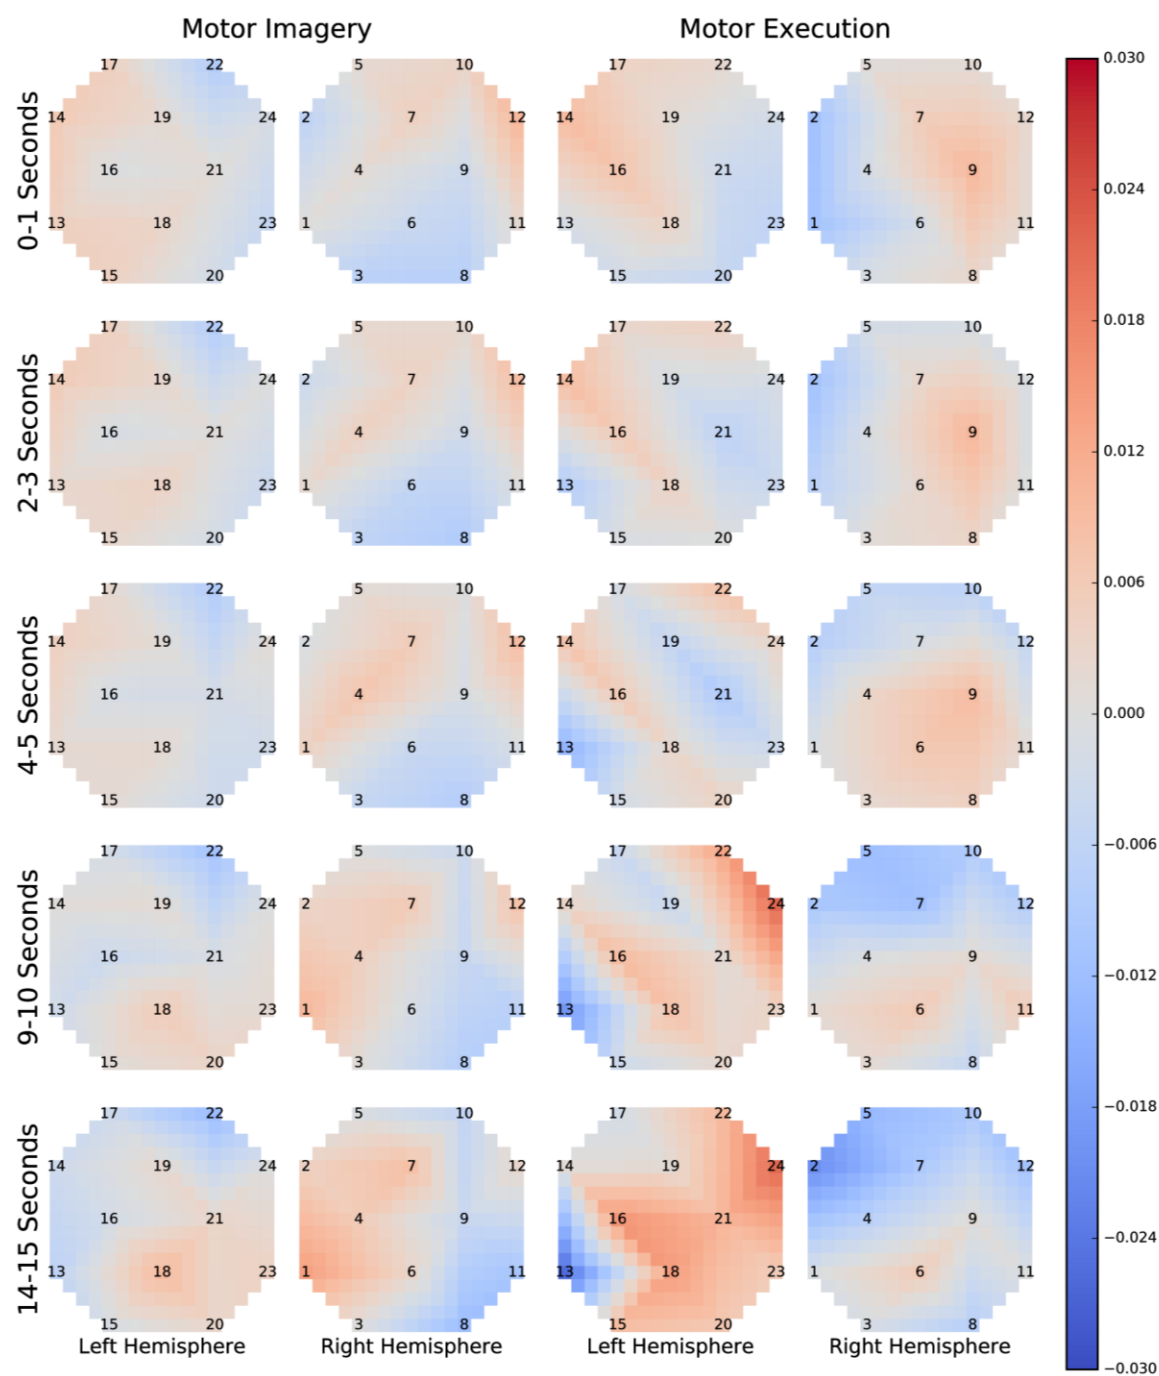

**Fig. S4** Average in HbO activation over time for motor imagery and motor execution during the right foot task
