# Supplementary material for: Comparison of Brain Activation during Motor Imagery and Motor Movement Using fNIRS
Source: Comput Intell Neurosci. 2017 May 4;2017:5491296. doi: 10.1155/2017/5491296 (PMC5435907; doi:10.1155/2017/5491296)
Supplement: Supplementary file 1 — The Supplementary Material accompanying this paper includes additional results in tables for the three statistical analyses. It also includes a figure comparing motor imagery and motor execution activation patterns over time for each of the four motor tasks. [file 5491296.f1.zip]

Archive with 2 entries (2 files):
- OnlineResource1_CIN_1902839.docx
- OnlineResource1_CIN_1902840.pdf
